# Supplementary material for: The mutational pattern of homologous recombination-related (HRR) genes in Chinese colon cancer and its relevance to immunotherapy responses
Source: publisher site journal article supplement (doi:10.18632/aging.202267), 2020-12-09
Supplement: Supplementary file [file aging-v13i2-202267-supplementary-material-SD1.pdf]

SUPPLEMENTARY FIGURE

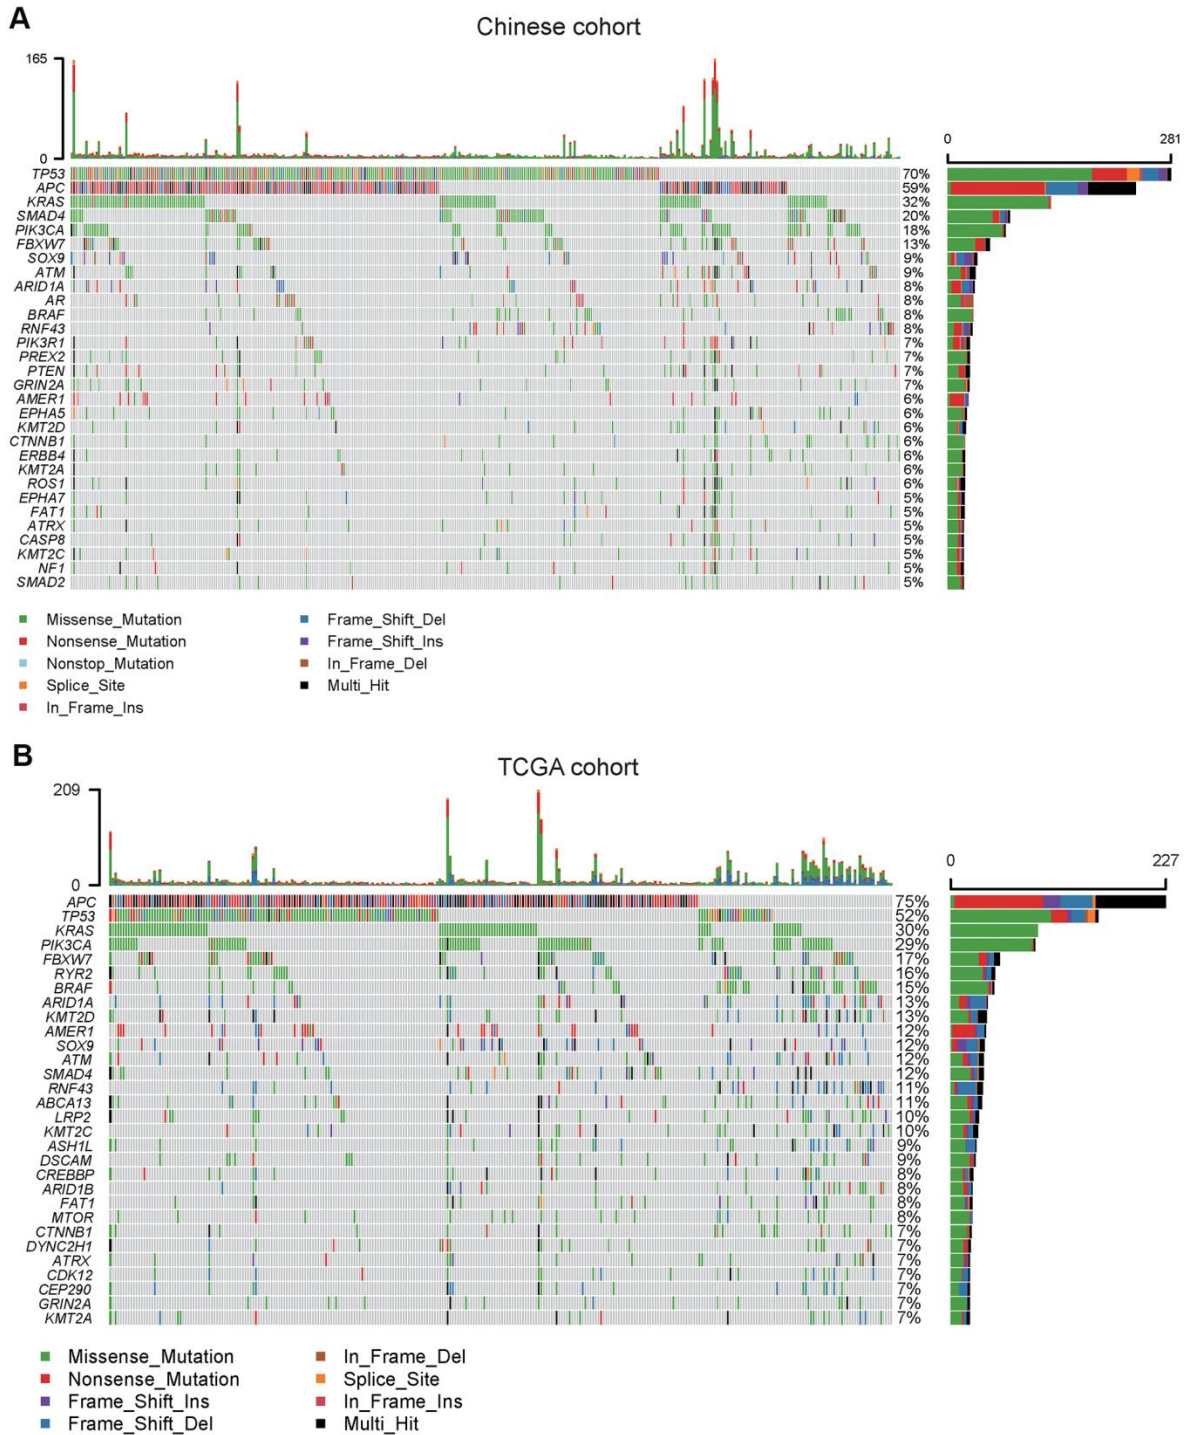

**Supplementary Figure 1. Mutational landscape in COAD patients.** Mutational landscape of the 30 most frequently mutated genes in the Chinese cohort (A) and TCGA cohort (B). The columns and rows represent patients and genes, respectively, and are sorted in decreasing order by the number of patients in whom a gene is mutated. The right panel indicates the frequency of gene mutations. Mutation types are differentiated by colors.
